# Supplementary material for: Self-powered broadband, high-detectivity and ultrafast photodetectors based on Pd-MoS2/Si heterojunctions
Source: Royal Society of Chemistry journal article supplement (doi:10.1039/c5cp05642j), 2015-11-30
Supplement: c5cp05642j1.pdf [file c5cp05642j1.pdf]

## **Electronic supplementary information**

### **Self-Powered Broadband, High-Detectivity and Ultrafast Photodetectors Based on Pd-MoS<sub>2</sub>/Si Heterojunctions**

L. Z. Hao,<sup>\*a,b</sup> W. Gao,<sup>b</sup> Y. J. Liu,<sup>b</sup> Y. M. Liu,<sup>b</sup> Z. D. Han,<sup>b</sup> Q. Z. Xue,<sup>\*a</sup> and J. Zhu<sup>c</sup>

<sup>a</sup>State Key Laboratory of Heavy Oil Processing, China University of Petroleum,  
Qingdao, Shandong 266580, P. R. China

<sup>b</sup>College of Science, China University of Petroleum, Qingdao, Shandong 266580, P.  
R. China

<sup>c</sup>State Key Laboratory of Electronic Thin Films and Integrated Devices, University of  
Electronic Science and Technology of China, Chengdu 610054, P. R. China

#### **Corresponding Authors**

Email: [haolanzhong@upc.edu.cn](mailto:haolanzhong@upc.edu.cn); [xueqz@upc.edu.cn](mailto:xueqz@upc.edu.cn)

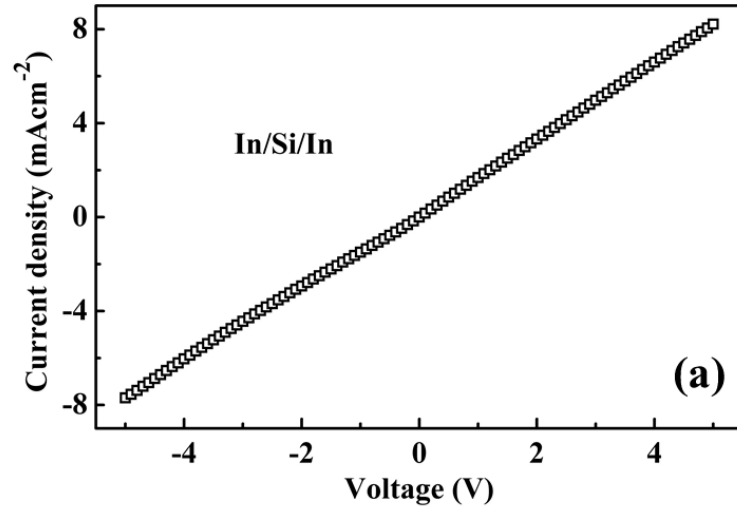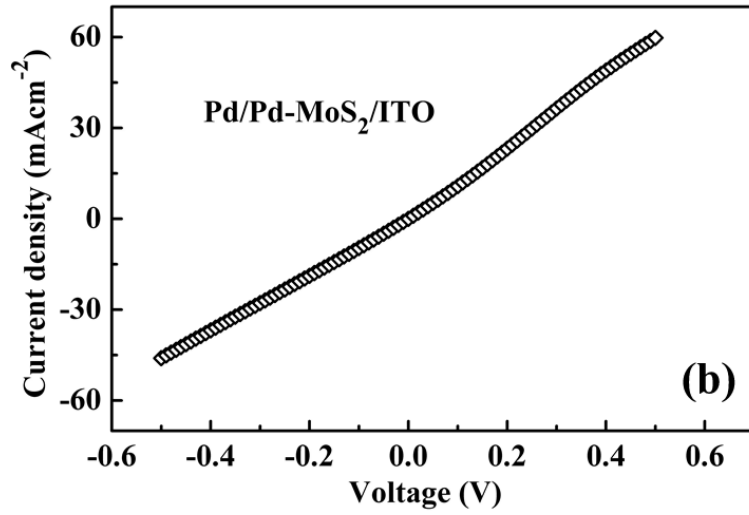

**Fig. S1.**  $I$ - $V$  curves of (a) the In/n-Si/In and (b) the Pd/Pd-MoS<sub>2</sub> film/ITO.

Fig. S1 shows the  $J$ - $V$  curves of the In/n-Si/In and Pd/Pd-MoS<sub>2</sub> film/ITO structure, respectively.

From the figure, the linear characteristics of the  $J$ - $V$  curves for both the devices are observed. This

demonstrates that the contacts of In/Si and Pd/Pd-MoS<sub>2</sub> film are ohmic.

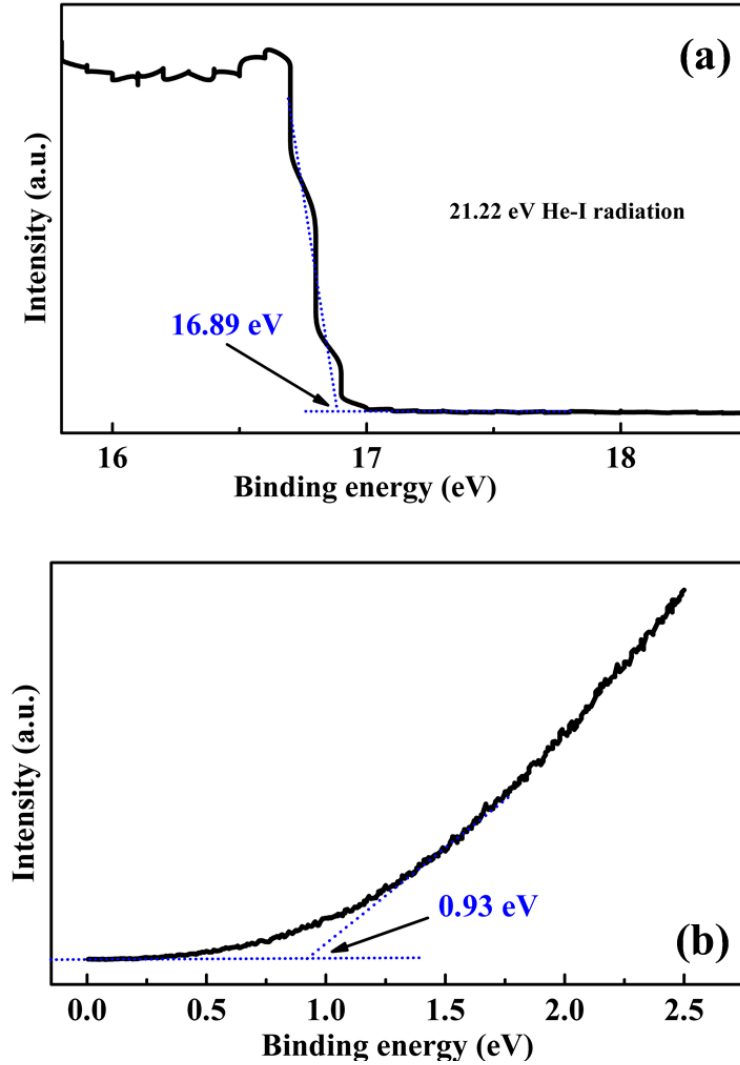

**Fig. S2.** UPS spectra of the MoS<sub>2</sub> film on Si, showing its Fermi level (a) and the distance between the Fermi level and the conduction band (b), respectively.

Figure S2 shows the UPS spectrum of the MoS<sub>2</sub> film without Pd doping. The work function ( $W$ ) of the film can be calculated from the difference between the cutoff of the highest binding energy and the photon energy of the exciting radiation. As shown in Figure S2(a),  $W=4.33$  eV. The distance ( $\Delta E$ ) between the valence band and Fermi level of MoS<sub>2</sub> film can be extracted from the onset energy, as shown in Figure 2S(b). The  $\Delta E$  is determined to be 0.93 eV. This further demonstrates the n-type behavior of the MoS<sub>2</sub> film without Pd doping.
